# Supplementary material for: A cellular disease model toward gene therapy of TGM1-dependent lamellar ichthyosis
Source: PubMed Central journal article supplement — Mol Ther Methods Clin Dev. 2024 Jul 31;32(3):101311. doi: 10.1016/j.omtm.2024.101311 (PMC11372595; doi:10.1016/j.omtm.2024.101311), 2024-07-31
Supplement: mmc1.pdf [file mmc1.pdf]

OMTM, Volume 32

## Supplemental information

### **A cellular disease model toward gene therapy of *TGM1*-dependent lamellar ichthyosis**

**Laura Sercia, Oriana Romano, Grazia Marini, Elena Enzo, Mattia Forcato, Laura De Rosa, and Michele De Luca**

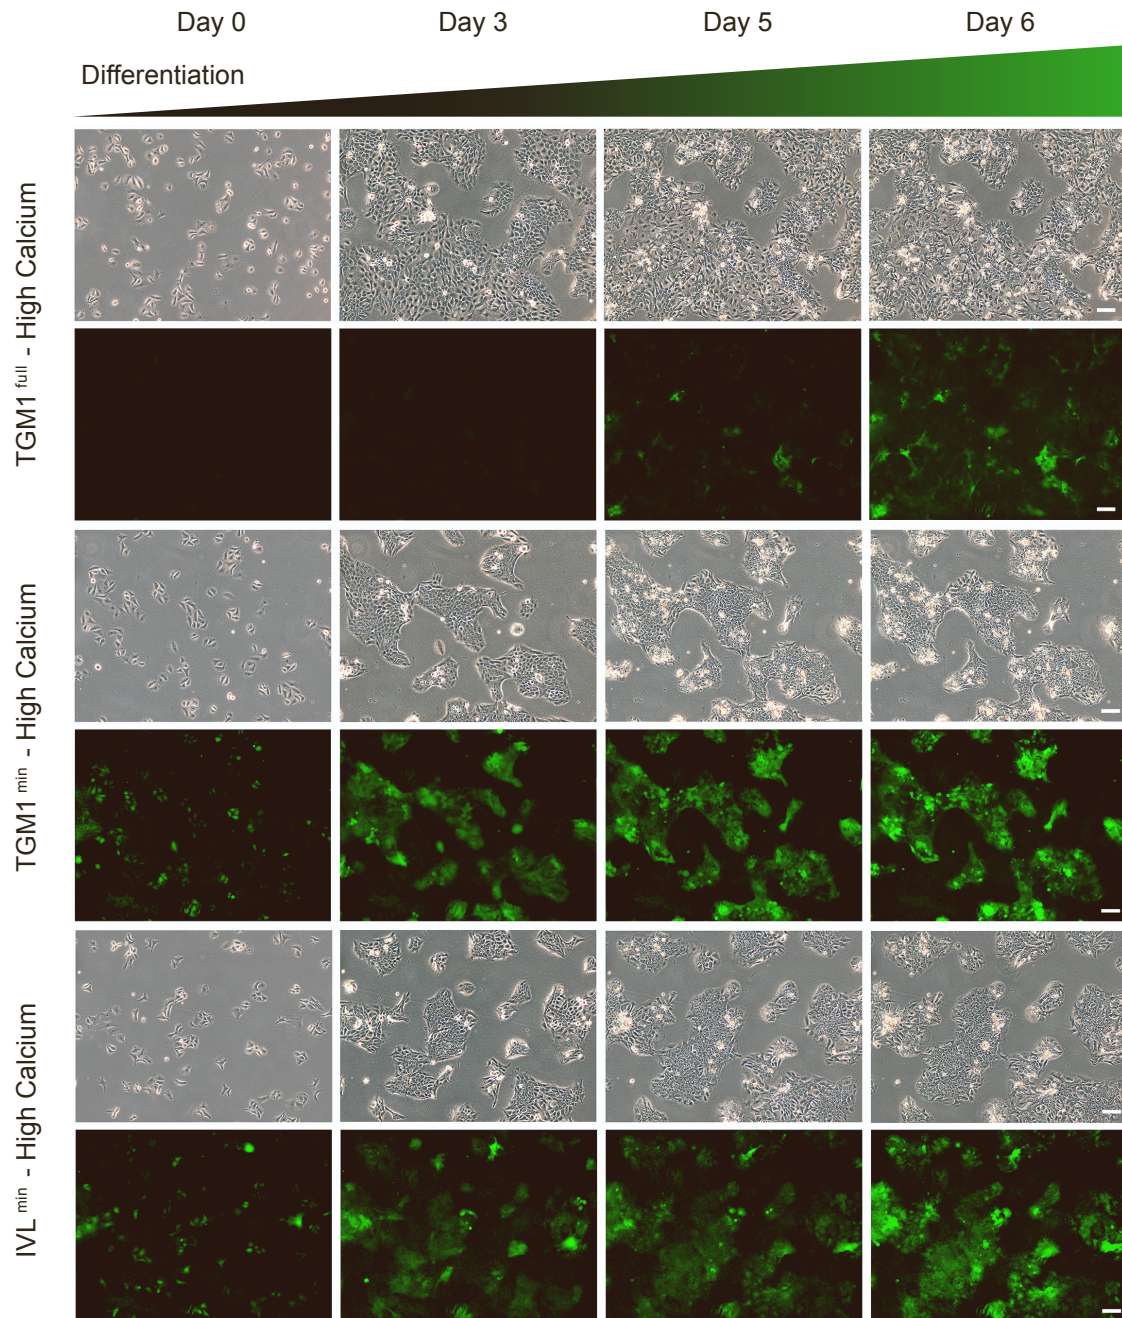

**Figure S1. Time-resolved promoter activity by live-cell imaging of HaCaT cells transduced with SIN $\gamma$ -RVs.** Representative bright-field and fluorescent micrographs of HaCaT cells transduced with three different promoters, from top to bottom: the 2.2-Kb human TGM1 full length promoter (TGM1<sup>full</sup>), the 367-bp human TGM1 minimal promoter (TGM1<sup>min</sup>), the 637-bp human Involucrin minimal promoter (IVL<sup>min</sup>), grown in high calcium medium for 6 days. n=3, pictures are representative of what was observed in at least three independent samples or replicates. Scale bars, 50  $\mu$ m.

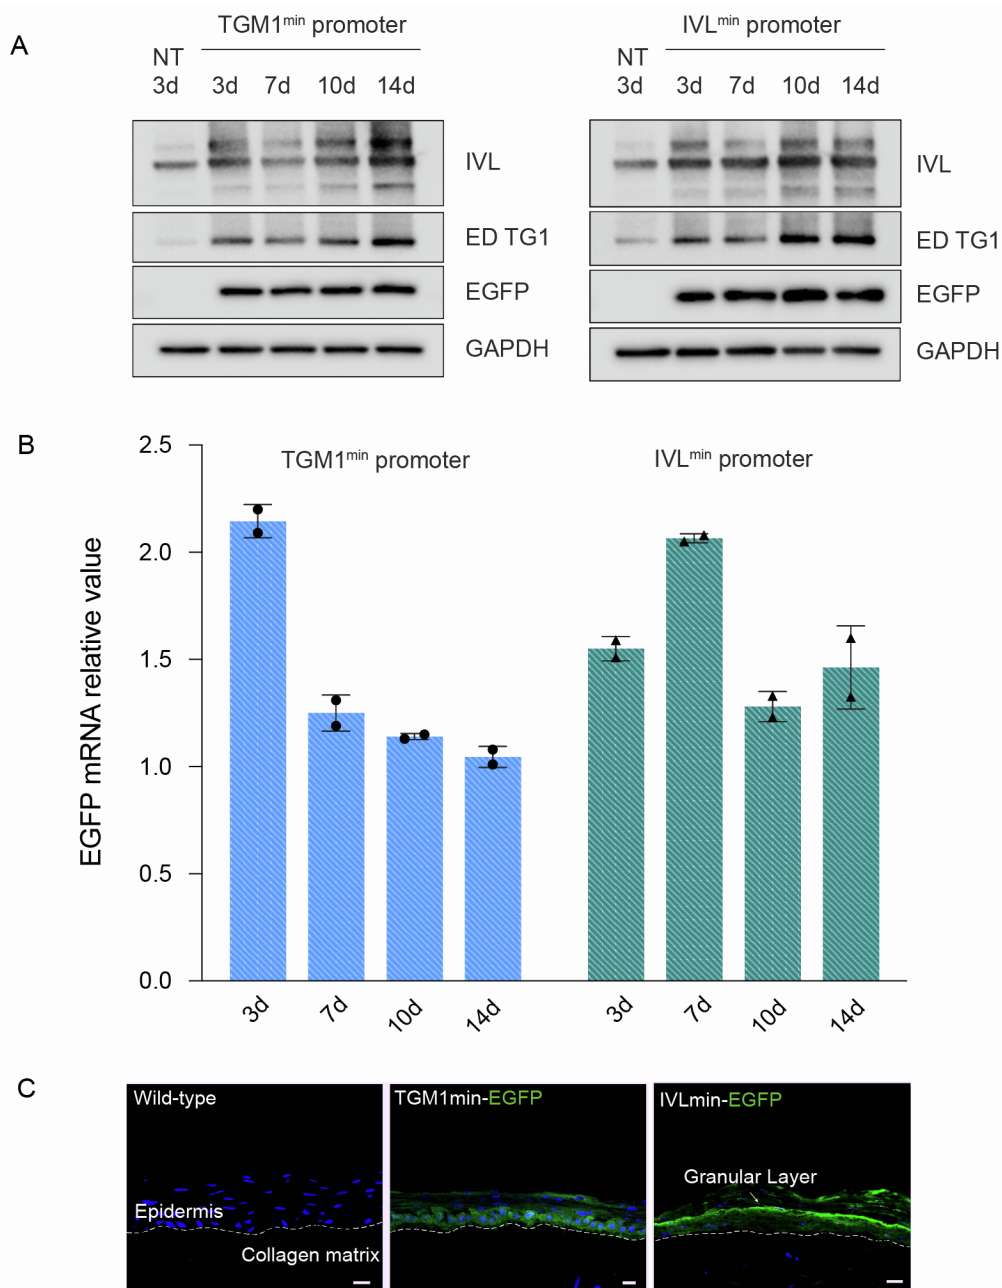

**Figure S2. TGM1<sup>min</sup> and IVL<sup>min</sup> promoters activity in keratinocytes.** A) Western blot analysis of keratinocyte differentiation markers (IVL and endogenous TG1) and EGFP in growing (3d), confluent (7-10d) and over-confluent (14d) K82 keratinocytes transduced with (left) a SIN $\gamma$ -RV carrying EGFP under the control of TGM1<sup>min</sup> promoter or, (right) a SIN $\gamma$ -RV carrying EGFP under the control of IVL<sup>min</sup> promoter. B) EGFP mRNA expression during transgenic keratinocyte differentiation (3d-14d). GAPDH mRNA was used to normalize the qRT-PCR (\*  $p < 0.0001$ ). C) Representative immunofluorescent images of 7  $\mu$ m-thick cryosections of 3D skin equivalents obtained with TGM1<sup>min</sup> or IVL<sup>min</sup> promoter-transduced keratinocytes showing the EGFP fluorescent signal. White dotted line marks the epidermal-dermal junction. Scale bars 20  $\mu$ m.

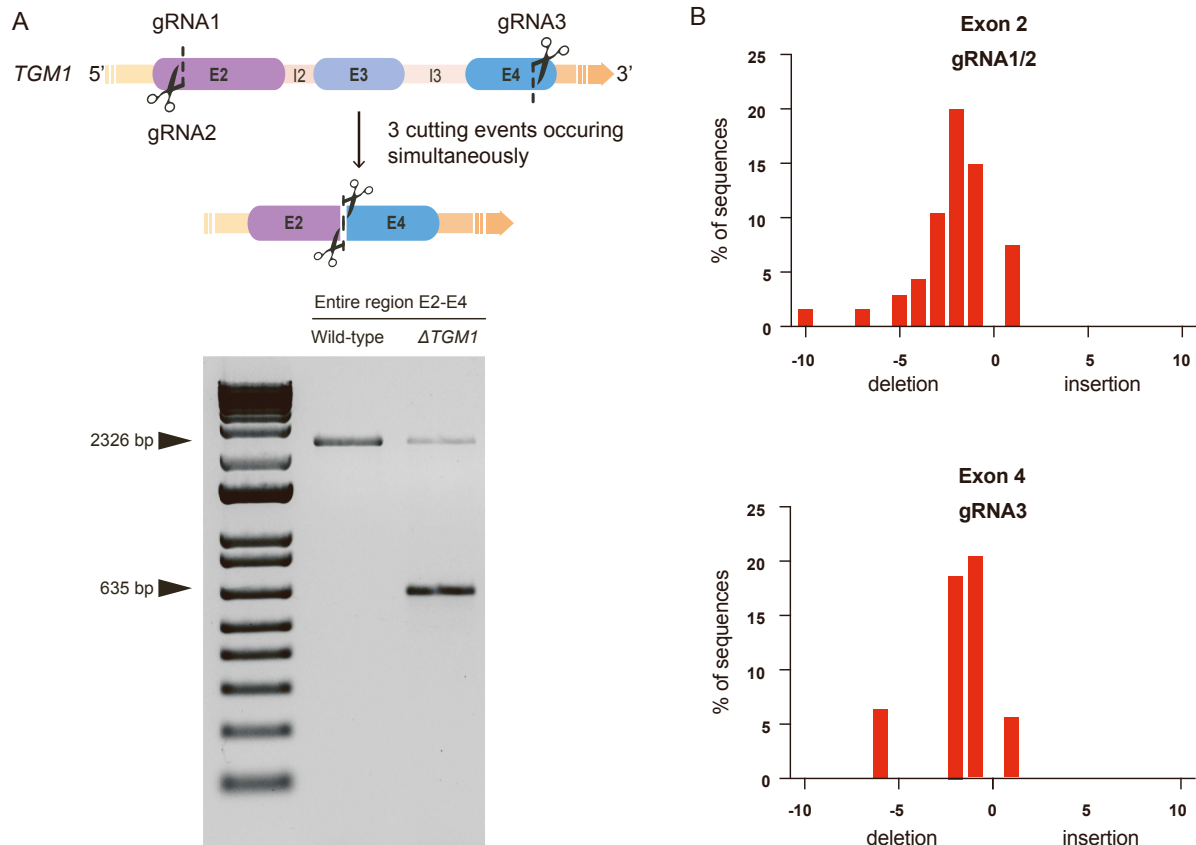

**Figure S3. Genotype of  $\Delta TGM1$  cellular model.** A) Top: *TGM1*-knockout strategy design. gRNA1 and gRNA2 target Exon 2, exploiting the presence of an SNP in a wild-type strain (K81), while gRNA3 targets Exon 4 of the *TGM1* gene. If the three cutting events occur simultaneously the resulting *TGM1* gene should be shorter as depicted in figure. Bottom: PCR analysis of genomic DNA from wild-type and  $\Delta TGM1$  keratinocytes (K81), spanning both the Cas9 target sites to evaluate the excision of the 1.7 Kb genomic region between Exon 2 and Exon 4. Note that the excision of the entire genomic region is a high frequency event. B) TIDE decomposition analysis through Sanger sequencing of edited genomic sequences in  $\Delta TGM1$  keratinocytes (K81) with gRNA1/2 (editing *TGM1*-E2) and gRNA3 (editing *TGM1*-E4) showing the overall editing efficiencies and the percentage of indel formation (insertions and deletions) in both edited exons, as compared to a wild-type sequence. The overall editing efficiencies, reaching 100%, is indicated by the absence of non-edited sequences (point 0 of the graphs) and the presence of a significant amount of InDels abolishing the open reading frame and expression of *TGM1*.



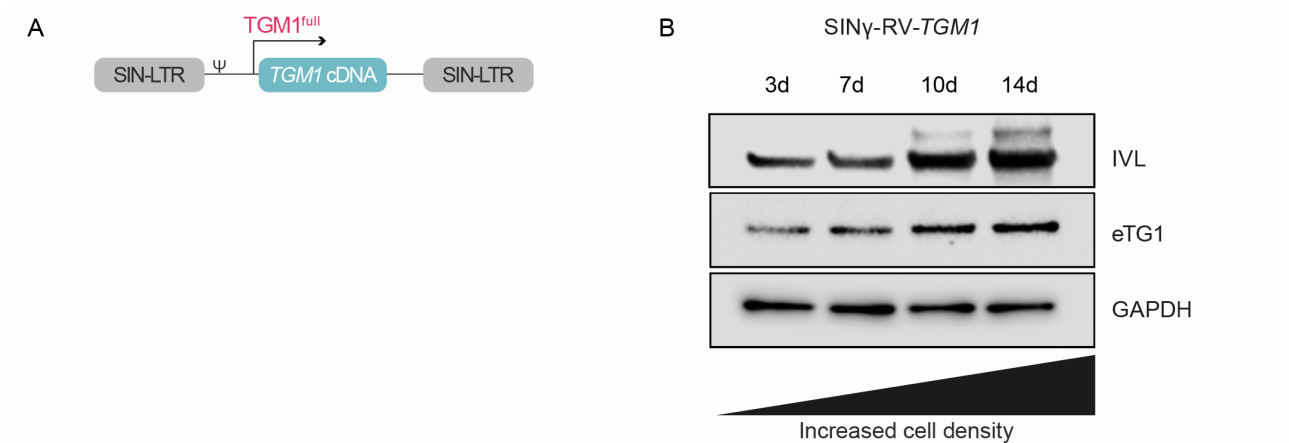

**Figure S4. TG1 expression in  $\Delta TGM1$  keratinocytes cultures at increased cell densities.** A)  $SIN\gamma RV$  vector expressing *TGM1* cDNA under the control of its own promoter ( $SIN\gamma RV-TGM1$ ). B) Western blot analysis of exogenous TG1 (eTG1) and IVL differentiation marker in growing (3d), confluent (7-10d) and over-confluent (14d) keratinocytes transduced with  $SIN\gamma RV-TGM1$ . n=3, picture is representative of what was observed in at least three independent replicates.

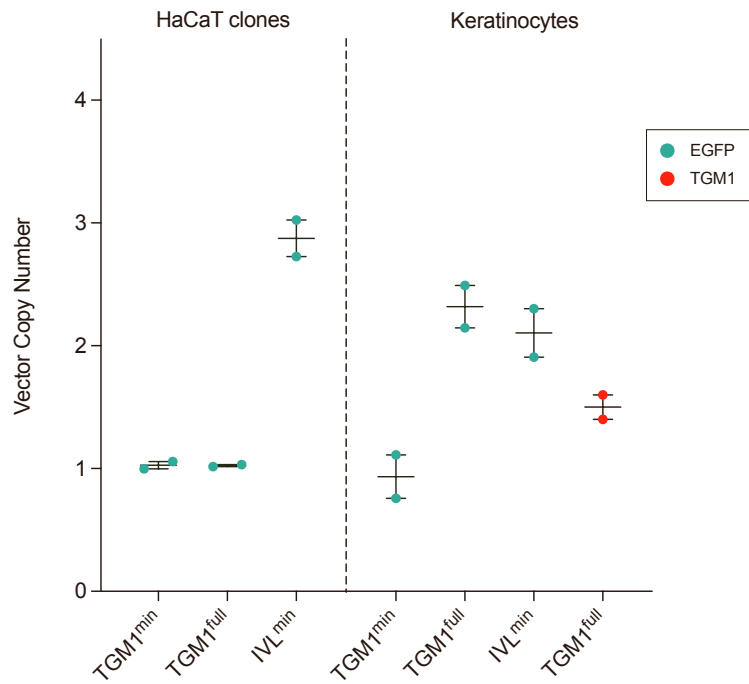

**Figure S5. Vector Copy Number (VCN) of transduced HaCaT clones and keratinocytes cultures.** ddPCR analysis of EGFP (green) and exogenous *TGM1* (red) Vector Copy Number in HaCaT clones (right) and bulk K82 keratinocytes (left) transduced with SIN $\gamma$ -RV carrying TGM1<sup>min</sup>, TGM1<sup>full</sup> or IVL<sup>min</sup> promoters. For the exogenous *TGM1* (red) VCN evaluation was used a custom probe design to recognize the provirus integration, that binds an exon-exon junction. VCN was absolutely quantified considering an internal reference gene (hGAPDH, VCN=2), n=2. Dots represent the single values, while middle line represents the mean value.

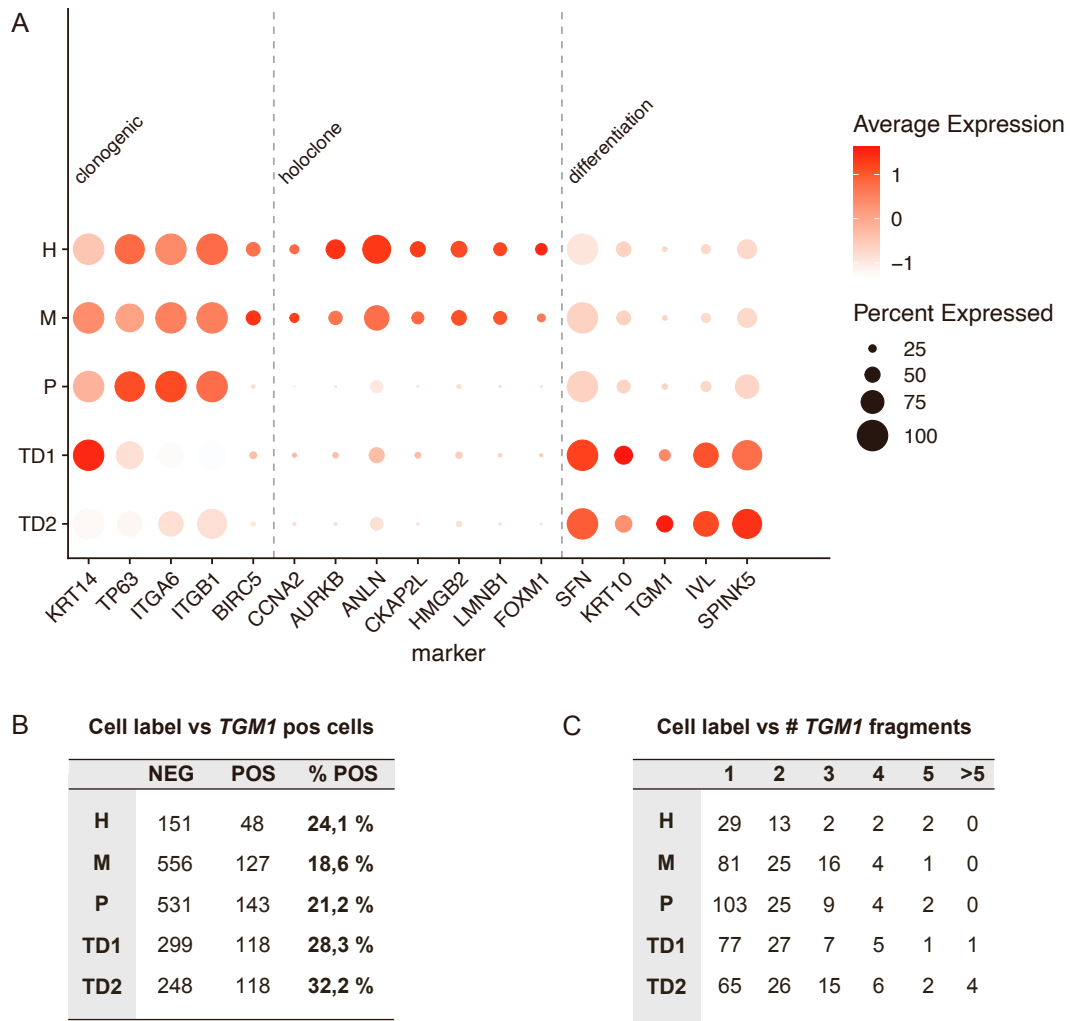

**Figure S6. Single-cell multiomic analysis of *TGMI*-transduced keratinocytes.** A) DotPlot showing the expression of clonogenic, holoclone and differentiation markers in the five SIN $\gamma$ -RV-*TGMI* keratinocytes populations. Dots size indicates the percentage of cells expressing that gene, the average expression color scale refers to scaled data. B) Percentages of positive cells (bold), containing at least one provirus fragment and negative cells, without provirus integration, for each keratinocytes population. C) Number of SIN $\gamma$ -RV-*TGMI* provirus fragments retrieved in individual cells, for each keratinocytes population.

**Table S1.** List of primers used with specified name, sequence, and application.

|     | Primer name                 | Sequence (5'-3')                       | Application          | Notes                                        |
|-----|-----------------------------|----------------------------------------|----------------------|----------------------------------------------|
| #1  | TGM1 PromP1_F               | ACCTAGTTAACGCTGAGTGTCTGCTCCCAT<br>G    | PCR<br>amplification | distal region (-1.6<br>Kb / -1.4 Kb)         |
| #2  | TGM1 PromP1_R               | TACAGGGCCGGCCTCCCAGAGAACCAGTA<br>GGATG | PCR<br>amplification |                                              |
| #3  | TGM1 PromP2_F               | ATTCTGGCCGGCCTGCTCCCTCCCTAGC           | PCR<br>amplification | proximal region<br>(90 bp / +67 bp)          |
| #4  | TGM1 PromP2_R               | GATTTCCATGGTCAGGATGGATGGGAC            | PCR<br>amplification |                                              |
| #5  | IVL PromP1_F                | TTGGGTAAACAGCTTCTCCATGTGTCATG          | PCR<br>amplification | distal region (-<br>2.473 Kb / -2.036<br>Kb) |
| #6  | IVL PromP1_R                | GAAGGCCGGCCGGTCTTATGGGTTAGC            | PCR<br>amplification |                                              |
| #7  | IVL PromP2_F                | ATTAGGCCGGCCAGGAATAGTTGAGCTAC<br>CAG   | PCR<br>amplification | proximal region<br>(221 bp / +6 bp)          |
| #8  | IVL PromP2_R                | GAAATCCATGGTGCTGAGCTGAGCAGGAG          | PCR<br>amplification |                                              |
| #9  | TGM1 <sup>full</sup> Prom_F | AACTAGTTAACGCCAAGGCTTCAGTGTTT<br>G     | PCR<br>amplification | full length<br>promoter (2.2 Kb)             |
| #10 | TGM1 <sup>full</sup> Prom_R | ATTATGGCCGGCCGAGGTCTGGGGGCTTA<br>GG    | PCR<br>amplification |                                              |
| #11 | TGM1_Exon2_F                | GATGGGCCACGTTCCGATG                    | KO analysis          |                                              |
| #12 | TGM1_Exon3_R                | CGGGACAGGAGGAGGAGC                     | KO analysis          |                                              |
| #13 | TGM1_Intron3_F              | CAGTGGCTCATACACATTGTG                  | KO analysis          |                                              |
| #14 | TGM1_Exon5_R                | CTGCCGCCAATCCTCATGG                    | KO analysis          |                                              |

**Table S2.** List of TaqMan® probes used for qRT-PCR and catalog number.

| <b>TaqMan® probes</b> | <b>Company</b> | <b>Catalog number</b> |
|-----------------------|----------------|-----------------------|
| EGFP                  | Thermo Fisher  | Mr00660654_cn         |
| GAPDH                 | Thermo Fisher  | 4352665               |
| Genomic GAPDH         | Thermo Fisher  | Hs03929097_g1         |
| K10                   | Thermo Fisher  | Hs00166289_m1         |
| TGM1 Exon 14-15       | Thermo Fisher  | Hs00165929_m1         |
| Exogenous TGM1        | Thermo Fisher  | Custom made           |



**Table S3.** List of antibodies, source, and concentration.

| Antibody information                         |                          |                      |                    | Dilution/amount     |                 |
|----------------------------------------------|--------------------------|----------------------|--------------------|---------------------|-----------------|
| Antibody                                     | Company                  | Catalog number       | Description        | WB                  | IF              |
| anti-TGM1                                    | Invitrogen               | PA5-59088            | Rabbit polyclonal  | 1/1000 - 1/4000     |                 |
| anti-TGM1                                    | Merk                     | HPA040171            | Rabbit polyclonal  |                     | 1/2000          |
| anti-Cytokeratin 14                          | BioLegend                | 905301               | Rabbit polyclonal  |                     | 1/150,000       |
| anti-Collagen XVIIA1                         | Genetex                  | GTX54647             | Mouse monoclonal   |                     | 1/100           |
| anti-SPINK5                                  | Merk                     | HPA011351            | Rabbit polyclonal  |                     | 1/2000          |
| anti-human GAPDH                             | Merk                     | ZRB374 - clone 10B13 | Rabbit monoclonal  | 1/1000              |                 |
| anti-GAPDH                                   | Abcam                    | ab8245               | Mouse monoclonal   | 1/10,000            |                 |
| anti-Involucrin                              | Leica                    | NCL-INV              | Mouse monoclonal   | 1/2000              | 1/1000          |
| Anti-Loricrin                                | Abcam                    | Ab240187             | Rabbit monoclonal  |                     |                 |
| anti-Cytokeratin 10                          | BioLegend                | 905403               | Rabbit polyclonal  | 1/500               | 1/1000          |
| anti-GFP                                     | Santa Cruz Biotechnology | sc-9996              | Mouse monoclonal   | 1/250               |                 |
| anti-GFP                                     | Merk                     | AB10145              | Rabbit polyclonal  | 1/1000              | 1/500           |
| anti-Vimentin                                | BioLegend                | 699302               | Rat                |                     | 1/1000          |
| Alexa Fluor 568 anti-rat                     | Thermo Fisher Scientific | A11077               | secondary antibody |                     | 1/1000          |
| Donkey anti-rabbit IgG HRP                   | Santa Cruz Biotechnology | sc-2313              | secondary antibody | 1/2000              |                 |
| Donkey anti-mouse IgG HRP                    | Santa Cruz Biotechnology | sc-2314              | secondary antibody | 1/10,000 - 1/20,000 |                 |
| Donkey anti-Mouse IgG (H+L) Alexa Fluor 568  | Thermo Fisher Scientific | A10037               | secondary antibody |                     | 1/2000 - 1/1000 |
| Donkey anti-Rabbit IgG (H+L) Alexa Fluor 488 | Thermo Fisher Scientific | A21206               | secondary antibody |                     | 1/2000 - 1/1000 |
